# Supplementary material
Source: publisher figshare collection journal article supplement (https://acs.figshare.com/ndownloader/files/5067295)

## SUPPORTING INFORMATION FOR

### **Toward a carbohydrate-based HIV-1 vaccine: Synthesis and immunological studies of oligomannose-containing glycoconjugates**

Jiahong Ni, Haijing Song, Yadong Wang, Nicholas M. Stamatou, and Lai-Xi Wang\*

Institute of Human Virology, University of Maryland Biotechnology Institute, University of Maryland, Baltimore, MD 21201, USA

*Running title: Carbohydrate-based HIV-1 vaccine*

#### CONTENTS:

|                                                                               |    |
|-------------------------------------------------------------------------------|----|
| Figure S1. HPLC profile of the glycopeptide Man9Cluster-Pep.....              | S2 |
| Figure S2. ESI-MS spectrum of the synthetic glycopeptide Man9Cluster-Pep..... | S3 |
| Figure S3. HPLC profile of the synthetic glycoconjugate Man9-Pep.....         | S4 |
| Figure S4. ESI-MS spectrum of the synthetic glycopeptide Man9-Pep.....        | S5 |

Figure S1. HPLC profile of the glycopeptide Man9Cluster-Pep (**10**)

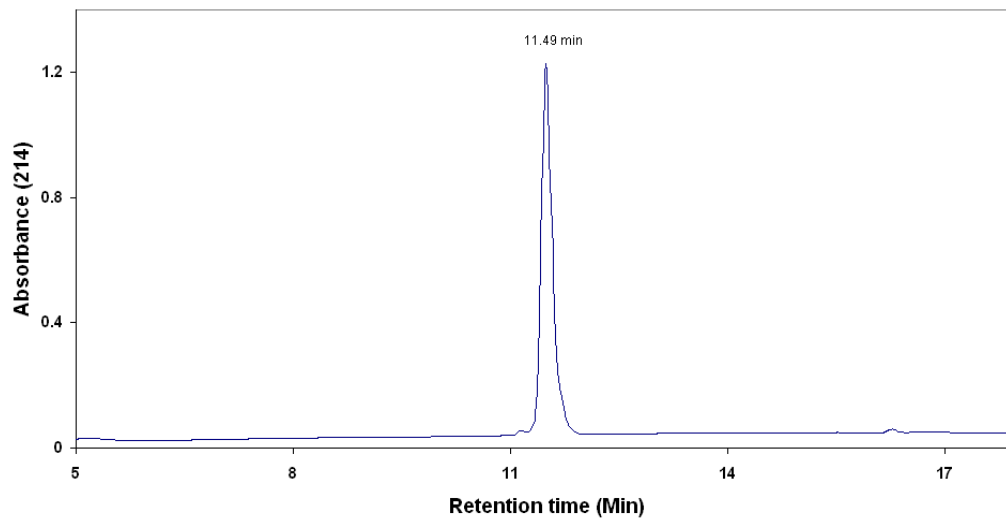

Analytical HPLC was carried out with a Waters 626 HPLC instrument on a Waters Nova-Pak C18 column (3.9x150 mm) at 40 °C. The column was eluted with a linear gradient (0-90%) of MeCN containing 0.1% TFA within 25 min at a flow rate of 1 mL/min with UV (214 nm) detection.

Figure S2. ESI-MS spectrum of the glycopeptide Man9Cluster-Pep (**10**)

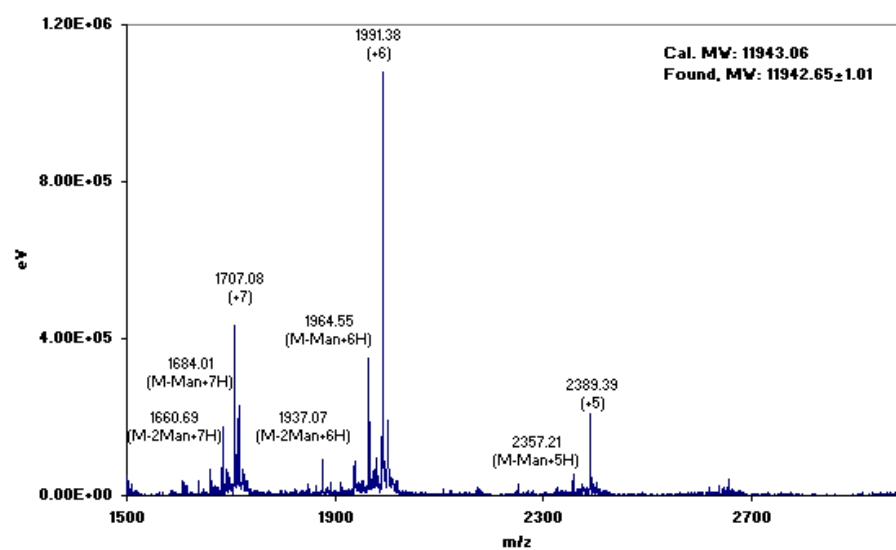

Figure S3. HPLC profile of the glycopeptide Man9Cluster-Pep (**13**)

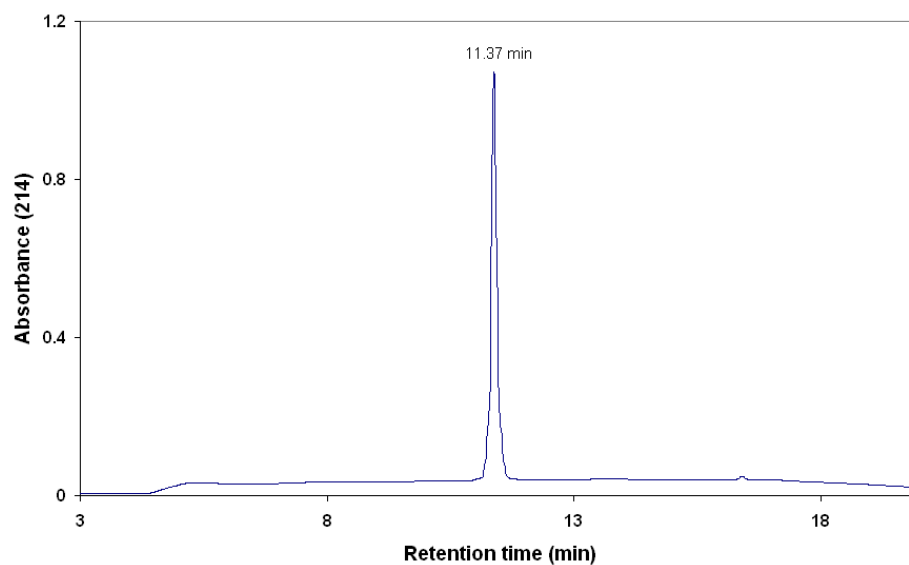

Analytical HPLC was carried out with a Waters 626 HPLC instrument on a Waters Nova-Pak C18 column (3.9x150 mm) at 40 °C. The column was eluted with a linear gradient (0-90%) of MeCN containing 0.1% TFA within 25 min at a flow rate of 1 mL/min with UV (214 nm) detection.

Figure S4. ESI-MS spectrum of the glycopeptide Man9Cluster-Pep (**13**)

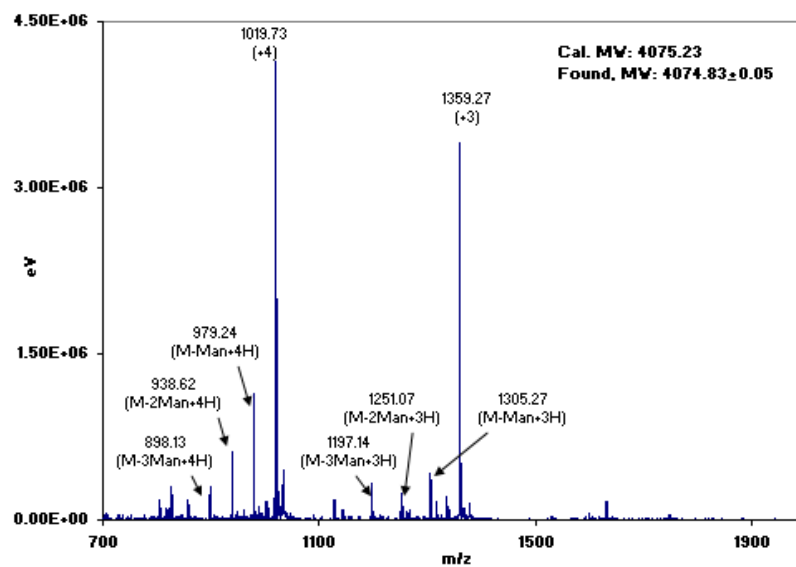

Supplement: Supplementary file 1 [file 5067295]
